# Supplementary material
Source: Royal Society of Chemistry journal article supplement (doi:10.1039/d5ta10056a)
Supplement: d5ta10056a1.pdf [file d5ta10056a1.pdf]

## Supplementary Information

# Photogenerated Carrier-assisted Electrocatalysis: Mechanistic Perspectives and Catalytic Advances

Wenhao Lu,† Tingting Du,† Xing Lin, Hao Cui, Fei Xue, Xin Zhang\* and Fengchun Yang\*

Key Laboratory of Synthetic and Natural Functional Molecule Chemistry of Ministry of Education,

College of Chemistry and Material Science, Northwest University, Xi'an, 710127, China.

†Wenhao Lu and Tingting Du contributed equally to this manuscript.

\*Corresponding author and E-mail: zhangxin@nwu.edu.cn; fyang@nwu.edu.cn.

Table S1. Timeline of major developments in PCAE.

| <b>Year</b> | <b>Development</b>                                     | <b>Ref.</b> |
|-------------|--------------------------------------------------------|-------------|
| 1972        | First photo-assisted water splitting                   | 20          |
| 1984        | First photo-assisted CO <sub>2</sub> reduction         | 22          |
| 2005        | First photo-assisted methanol oxidation                | 23          |
| 2014        | First photo-assisted formic acid oxidation             | 24          |
| 2014        | First light-assisted Li-O <sub>2</sub> battery         | 25          |
| 2018        | First photo-assisted rechargeable Zn-air batteries     | 26          |
| 2021        | First photo-driven urea-assisted hydrogen generation   | 27          |
| 2023        | First light field-enhanced nitrogen reduction reaction | 28          |

Table S2. The strategy and performance of PCAE.

| No.                                                                                                | Catalyst                                                           | Strategy                 | Dark condition                                  |                                          |                                      |                                                                                                    | Light condition                                 |                                         |                                      |                                      | Stability                                             | Reaction type      | Ref. |
|----------------------------------------------------------------------------------------------------|--------------------------------------------------------------------|--------------------------|-------------------------------------------------|------------------------------------------|--------------------------------------|----------------------------------------------------------------------------------------------------|-------------------------------------------------|-----------------------------------------|--------------------------------------|--------------------------------------|-------------------------------------------------------|--------------------|------|
|                                                                                                    |                                                                    |                          | Overpotential (mV)                              | Tafel (mV dec <sup>-1</sup> )            | Mass activity (mA mg <sup>-1</sup> ) | Others                                                                                             | Overpotential (mV)                              | Tafel (mV dec <sup>-1</sup> )           | Mass activity (mA mg <sup>-1</sup> ) | Others                               |                                                       |                    |      |
| Note: unless stated otherwise, measurements were performed in in 1 M KOH at 10 mA cm <sup>-2</sup> |                                                                    |                          |                                                 |                                          |                                      |                                                                                                    |                                                 |                                         |                                      |                                      |                                                       |                    |      |
| 1                                                                                                  | BP QDs/MoS <sub>2</sub>                                            | Heterojunction           | 320/470/670/770<br>[1/0.5/0.2/0.1 M KOH]        | 108/141/245/264<br>[1/0.5/0.2/0.1 M KOH] | -                                    | -                                                                                                  | 170/400/650/720<br>[1/0.5/0.2/0.1 M KOH]        | 95/135/231/247<br>[1/0.5/0.2/0.1 M KOH] | -                                    | -                                    | CA: 10000 s<br>[1.4 V, 7.5 mA cm <sup>-2</sup> ]      | OER                | 42   |
| 2                                                                                                  | CoFe PBA/CoS <sub>2</sub><br>CNBs                                  | Heterojunction           | 301                                             | 79.6                                     | -                                    | -                                                                                                  | 275 mV                                          | 59.2                                    | -                                    | -                                    | CA: 45 h [1.5 V]                                      | OER                | 43   |
| 3                                                                                                  | CoS <sub>2</sub> /MoS <sub>2</sub> /Ni <sub>3</sub> S <sub>2</sub> | Heterojunction           | 195/341<br>[10/100 mA cm <sup>-2</sup> ]        | 56.2                                     | -                                    | -                                                                                                  | 166/282<br>[10/100 mA cm <sup>-2</sup> ]        | -                                       | -                                    | -                                    | CA: 12 h [0.4 V]                                      | OER                | 44   |
| 4                                                                                                  | SnS <sub>2</sub> /NiO                                              | Heterojunction           | 388                                             | 215                                      | -                                    | -                                                                                                  | 310                                             | 190                                     | -                                    | -                                    | CA: 10 h<br>[87.8%, normalized current]               | OER                | 45   |
| 5                                                                                                  | CF/WS/CNTs                                                         | Heterojunction           | 224                                             | 47                                       | -                                    | -                                                                                                  | 291                                             | 78                                      | -                                    | -                                    | CA: 10 h [0.291 V]                                    | OER                | 39   |
| 6                                                                                                  | Pt-BiOBr                                                           | Schottky junction        | -                                               | -                                        | 26.5/155.4[MOR/EOR]                  | -                                                                                                  | -                                               | -                                       | 751.7/929.8[MOR/EOR]                 | -                                    | CA: 3000 s<br>[30.9/16.9 mA mg <sup>-1</sup> MOR/EOR] | MOR/EOR            | 46   |
| 7                                                                                                  | Pt/BiVO <sub>4</sub> /Bi <sub>2</sub> O <sub>3</sub>               | Heterojunction           | -                                               | -                                        | 506.6                                | -                                                                                                  | -                                               | -                                       | 281.4                                | -                                    | CA: 425 s<br>[0.751 V, light chopping mode]           | MOR                | 47   |
| 8                                                                                                  | WO/CN-Ni@CF                                                        | Heterojunction           | Potential: 1.48 V<br>[100 mA cm <sup>-2</sup> ] | -                                        | -                                    | -                                                                                                  | Potential: 1.34 V<br>[100 mA cm <sup>-2</sup> ] | -                                       | -                                    | -                                    | CP: 18 h [1.18 V]                                     | UOR                | 48   |
| 9                                                                                                  | TiO <sub>2</sub> -Fe <sub>2</sub> O <sub>3</sub>                   | Heterojunction           | -                                               | -                                        | -                                    | Power density: 22 mW m <sup>-2</sup>                                                               | -                                               | -                                       | -                                    | Power density: 28 mW m <sup>-2</sup> | -                                                     | UOR                | 49   |
| 10                                                                                                 | Ni <sub>3</sub> (VO <sub>4</sub> ) <sub>2</sub>                    | Morphological regulation | 122                                             | 82                                       | -                                    | -                                                                                                  | 90                                              | 50                                      | -                                    | -                                    | CV: 1000 cycle                                        | HER                | 50   |
| 11                                                                                                 | CdSe/WS <sub>2</sub>                                               | Quantum dots sensitized  | -1030                                           | 132                                      | -                                    | -                                                                                                  | -400                                            | 56                                      | -                                    | -                                    | CA: 24 h [-0.4 V]                                     | HER                | 51   |
| 12                                                                                                 | Ti <sub>3</sub> C <sub>2</sub> @P-WO <sub>3</sub>                  | Heterojunction           | 162                                             | 102                                      | -                                    | -                                                                                                  | 44                                              | 41                                      | -                                    | -                                    | CV: 5000 cycle                                        | HER                | 52   |
| 13                                                                                                 | STO/A-R TNTAs                                                      | Heterojunction           | -                                               | -                                        | -                                    | HCOOH: 68.24 μmol cm <sup>-2</sup> h <sup>-1</sup> ;<br>H <sub>2</sub> : 1.77 μmol h <sup>-1</sup> | -                                               | -                                       | -                                    | -                                    | CA: 24 h                                              | CO <sub>2</sub> RR | 53   |

|    |                                                                    |                                            |                                           |                      |       |                                                                    |                                        |                       |                                   |                                                                    |                                                                                                          |                    |    |
|----|--------------------------------------------------------------------|--------------------------------------------|-------------------------------------------|----------------------|-------|--------------------------------------------------------------------|----------------------------------------|-----------------------|-----------------------------------|--------------------------------------------------------------------|----------------------------------------------------------------------------------------------------------|--------------------|----|
| 14 | IrO <sub>2</sub> · nH <sub>2</sub> O                               | Dye 1 as sensitizer and a molecular bridge | -                                         | -                    | -     | Current density: 12.7 μA cm <sup>-2</sup>                          | -                                      | -                     | -                                 | -                                                                  | -                                                                                                        | Water Splitting    | 54 |
| 15 | CdS@Co <sub>9</sub> S <sub>8</sub> /Ni <sub>3</sub> S <sub>2</sub> | Morphological regulation                   | -                                         | 91.3 [OER]           | -     | -                                                                  | [HER/OER, -10/20 mA cm <sup>-2</sup> ] | 121/87.2 [HER/OER]    | -                                 | -                                                                  | CP: 40 h [1.15 V]                                                                                        | Water Splitting    | 55 |
| 16 | CdS@Ni <sub>3</sub> S <sub>2</sub> /Ni <sub>3</sub> P              | Heterojunction                             | -                                         | -                    | -     | -                                                                  | -130/300 [HER/OER]                     | 103.0/108.7 [HER/OER] | -                                 | -                                                                  | CA: 12 h [1.54 V]                                                                                        | Water Splitting    | 56 |
| 17 | NiFe-ZAIS                                                          | Heterojunction                             | 151/242 [HER/OER]                         | 111.7/71.6 [HER/OER] | -     | -                                                                  | 129/220 [HER/OER]                      | 105.0/54.6 [HER/OER]  | -                                 | -                                                                  | CV: 1000 cycle                                                                                           | Water Splitting    | 33 |
| 18 | PDTB TiO <sub>2</sub>                                              | Double cathode                             | -                                         | -                    | -     | Discharge: 1.20 V; Charge: 1.8 V                                   | -                                      | -                     | -                                 | Discharge: 1.90 V; Charge: 0.59 V                                  | Discharge/charge after cycle: 1.18/0.86 V                                                                | ORR/OER            | 57 |
| 19 | CeVO <sub>4</sub> @CNT                                             | Heterojunction                             | -                                         | -                    | -     | -                                                                  | -                                      | -                     | -                                 | Discharge: 2.59 V; Charge: 3.48 V                                  | 50 cycle specific capacity limit of 0.15 mAh cm <sup>-2</sup> for each cycle at 0.15 mA cm <sup>-2</sup> | ORR/OER            | 58 |
| 20 | Cu <sub>2</sub> O/β-Bi <sub>2</sub> O <sub>3</sub>                 | Heterojunction                             | -                                         | -                    | -     | Current density: 30.1 mA cm <sup>-2</sup>                          | -                                      | -                     | -                                 | Current density: 40.4 mA cm <sup>-2</sup>                          | CA: 9 h                                                                                                  | CO <sub>2</sub> RR | 63 |
| 21 | S-NiFeO <sub>x</sub> H <sub>y</sub> /CC                            | Doping                                     | 265                                       | 78                   | -     | Cdl: 1.58 mF cm <sup>-2</sup>                                      | 250                                    | 63                    | -                                 | Cdl: 10.93 mF cm <sup>-2</sup>                                     | CP: 24 h [20 mA cm <sup>-2</sup> ]                                                                       | OER                | 64 |
| 22 | Pt-Fe <sub>2</sub> O <sub>3</sub>                                  | Schottky junction                          | -                                         | -                    | 167.8 | -                                                                  | -                                      | -                     | 389.1/218.7 [Solar/visible light] | -                                                                  | CV: 300cycle                                                                                             | MOR                | 65 |
| 23 | Pd/hollow TiO <sub>2</sub> sphere (PHTG)                           | Morphological regulation                   | -                                         | -                    | 2657  | -                                                                  | -                                      | -                     | 3687 [UV]                         | -                                                                  | CA: 10000 s [1627 mA cm <sup>-2</sup> ]                                                                  | MOR                | 66 |
| 24 | CdS@Ni <sub>3</sub> S <sub>2</sub>                                 | Heterojunction                             | 330                                       | 85.5                 | -     | -                                                                  | 260                                    | 75                    | -                                 | -                                                                  | CA: 6 h [8.6 mA cm <sup>-2</sup> ]                                                                       | Water Splitting    | 69 |
| 25 | CeO <sub>2</sub> /MnO <sub>2</sub> -CFP                            | Heterojunction                             | -                                         | -                    | -     | Capacitance: 303.0 F · g <sup>-1</sup> at 0.25 A · g <sup>-1</sup> | -                                      | -                     | -                                 | Capacitance: 169.7 F · g <sup>-1</sup> at 0.25 A · g <sup>-1</sup> | CV: 100 cycle                                                                                            | Supercapacitors    | 70 |
| 26 | CdS@Ni <sub>3</sub> S <sub>2</sub> /Cu <sub>2</sub> S              | Heterojunction                             | 223/347 [HER/OER 20 mA cm <sup>-2</sup> ] | 151.7 [OER]          | -     | -                                                                  | [OER, 20 mA cm <sup>-2</sup> ]         | 133.7 [OER]           | -                                 | -                                                                  | CA: 40 h [15 mA cm <sup>-2</sup> ]                                                                       | Water Splitting    | 71 |
| 27 | In <sub>2</sub> O <sub>3</sub> @InP                                | Heterojunction                             | -44                                       | 121.2                | -     | Photocurrent density: 0.3 mA cm <sup>-2</sup>                      | -164                                   | 106.9                 | -                                 | Photocurrent density: 0.9 mA cm <sup>-2</sup>                      | CA: 80 h [-10/-20/-50/-100 mA cm <sup>-2</sup> ]                                                         | HER                | 72 |
| 28 | Ni- or Co-doped CeO <sub>2</sub>                                   | Schottky junction                          | 330 320                                   | 98 112               | -     | -                                                                  | 266 285                                | 86 78                 | -                                 | -                                                                  | -                                                                                                        | OER                | 73 |

|    |                                                        |                          |                                |                 |              |                                                                                                            |                                |                     |              |                                                                                                              |                                            |                             |    |
|----|--------------------------------------------------------|--------------------------|--------------------------------|-----------------|--------------|------------------------------------------------------------------------------------------------------------|--------------------------------|---------------------|--------------|--------------------------------------------------------------------------------------------------------------|--------------------------------------------|-----------------------------|----|
| 29 | CoMo-LDH@Ti <sub>3</sub> C <sub>2</sub> T <sub>x</sub> | Heterojunction           | -                              | -               | -            | NO <sub>3</sub> <sup>-</sup> yield of 125.9 μg h <sup>-1</sup> mg <sub>cat</sub> <sup>-1</sup> ; EF: 43.7% | -                              | -                   | -            | NO <sub>3</sub> <sup>-</sup> yield of 198.55 μg h <sup>-1</sup> mg <sub>cat</sub> <sup>-1</sup> ; EF: 46.22% | CA: 6000 s                                 | NOR                         | 74 |
| 30 | Ru NPs/SAs@N-TC                                        | Schottky junction        | 150                            | 75              | -            | -                                                                                                          | 90                             | 58                  | -            | -                                                                                                            | CA: 50000 s                                | HER                         | 75 |
| 31 | Rh/SnO <sub>2</sub>                                    | Schottky junction        | -                              | 127.6           | -            | Current density: 11.89 mA cm <sup>-2</sup>                                                                 | 247.05                         | 92.6                | -            | -                                                                                                            | Current density: 13.19 mA cm <sup>-2</sup> | FAOR                        | 76 |
| 32 | Pd/CeO <sub>2</sub>                                    | Schottky junction        | -                              | 322             | 2409.31      | -                                                                                                          | -                              | 285                 | 4161.72      | -                                                                                                            | -                                          | FAOR                        | 77 |
| 33 | PdSn/WO <sub>3</sub>                                   | Schottky junction        | -                              | 188             | 1339.5       | -                                                                                                          | -                              | 203                 | 2262.3       | -                                                                                                            | CA: 20000 s                                | FAOR                        | 78 |
| 34 | CoCr-LDH/CFP                                           | Morphological regulation | 445 [100 mA cm <sup>-2</sup> ] | 85              | -            | -                                                                                                          | 417 [100 mA cm <sup>-2</sup> ] | 74                  | -            | -                                                                                                            | CA: 15 h [1.57 V, 15 mA cm <sup>-2</sup> ] | Water Splitting             | 81 |
| 35 | CCN@FFC                                                | Heterojunction           | 137/271 [HER/OER]              | 97/53 [HER/OER] | -            | Cdl: 1.53 mF cm <sup>-2</sup>                                                                              | 68/182 [HER/OER]               | 38/44 [HER/OER]     | -            | Cdl: 4.87 mF cm <sup>-2</sup>                                                                                | CA: 18 h [10 mA cm <sup>-2</sup> ]         | Water Splitting             | 82 |
| 36 | CdS-CdSe/MoS <sub>2</sub> /NiFe-LDH                    | Heterojunction           | -                              | 177             | -            | Cdl: 15.9 mF cm <sup>-2</sup>                                                                              | -                              | 78                  | -            | Cdl: 22.2 mF cm <sup>-2</sup>                                                                                | CV: 500 cycle                              | HER                         | 83 |
| 37 | LaCoO <sub>3</sub> /NiFe LDH                           | Heterojunction           | 310                            | 100             | -            | -                                                                                                          | 260                            | 95                  | -            | -                                                                                                            | CA: 60 h [1.8 V, 460 mA cm <sup>-2</sup> ] | OER                         | 84 |
| 38 | Pt/g-C <sub>3</sub> N <sub>4</sub>                     | Schottky junction        | -                              | -               | 56           | -                                                                                                          | -                              | -                   | 132          | -                                                                                                            | CA: 2000 s                                 | MOR                         | 85 |
| 39 | Pt/g-C <sub>3</sub> N <sub>4</sub> /MoS <sub>2</sub>   | Heterojunction           | -                              | -               | 76.9         | -                                                                                                          | -                              | -                   | 165.5        | -                                                                                                            | CA: 3000 s [-0.2 V]                        | EOR                         | 86 |
| 40 | Pt-Bi <sub>2</sub> WO <sub>6</sub> /MoS <sub>2</sub>   | Heterojunction           | -                              | -               | 1781         | -                                                                                                          | -                              | -                   | 2743         | -                                                                                                            | CA: 1500 s [-0.2 V]                        | MOR                         | 87 |
| 41 | Cd-CoS <sub>x</sub>                                    | Doping                   | -                              | -               | 10.4 [0.6 V] | -                                                                                                          | -                              | -                   | 14.5 [0.6 V] | -                                                                                                            | CA: 8 h [0.6 V]                            | MOR                         | 89 |
| 42 | N-doped CoNiOOH                                        | Doping                   | -                              | -               | -            | 95 μmol h <sup>-1</sup> cm <sup>-2</sup> [1.5 V]                                                           | -                              | -                   | -            | 160 μmol h <sup>-1</sup> cm <sup>-2</sup> [1.5V]                                                             | CA: 48 h [2.5 V]                           | Water Splitting             | 90 |
| 43 | AB-OV/CC                                               | Defect Engineering       | -                              | -               | -            | Discharge: 2.76 V; Charge: 3.94 V                                                                          | -                              | -                   | -            | Discharge: 3.05 V; Charge: 3.25 V                                                                            | Charge voltage retention of 70% [500 h]    | Li-O <sub>2</sub> Batteries | 91 |
| 44 | Au-N <sub>x</sub> -C <sub>3</sub> N <sub>4</sub>       | Defect Engineering       | -                              | -               | -            | Discharge: 1.18 V; Charge: 3.52 V                                                                          | -                              | -                   | -            | Discharge: 1.60 V; Charge: 3.05 V                                                                            | Cycle stability [500 h]                    | Li-N <sub>2</sub> batteries | 92 |
| 46 | LaFe <sub>1-x</sub> O <sub>3</sub> -Fe <sub>y</sub>    | Defect Engineering       | 450                            | 73.0            | -            | -                                                                                                          | 634                            | 65.7                | -            | -                                                                                                            | CA: 30 h [1.8 V, 12 mA cm <sup>-2</sup> ]  | Water Splitting             | 93 |
| 47 | NiCo <sub>2</sub> S <sub>4</sub>                       | Doping                   | -                              | -               | -            | -                                                                                                          | 80/243 [HER/OER]               | 58.5/54.9 [HER/OER] | -            | -                                                                                                            | CA: 24 h [1.60 V, 80 mA cm <sup>-2</sup> ] | Water Splitting             | 96 |

|    |                                                                                                      |                       |                      |                        |                         |                                                                                                              |                     |                     |                         |                                                                                                                            |                                                              |                            |     |
|----|------------------------------------------------------------------------------------------------------|-----------------------|----------------------|------------------------|-------------------------|--------------------------------------------------------------------------------------------------------------|---------------------|---------------------|-------------------------|----------------------------------------------------------------------------------------------------------------------------|--------------------------------------------------------------|----------------------------|-----|
| 48 | MnWO <sub>4</sub> /FeCoNi                                                                            | Schottky junction     | 104/234<br>[HER/OER] | 60.6/67.4<br>[HER/OER] | -                       | -                                                                                                            | 64/204<br>[HER/OER] | 53.1/56.1 [HER/OER] | -                       | -                                                                                                                          | CA: 720 h<br>[500/1000 mA cm <sup>-2</sup> ]                 | Water Splitting            | 97  |
| 49 | CuO/ZnO/graphene                                                                                     | Heterojunction        | -                    | -                      | -                       | -                                                                                                            | -                   | -                   | -                       | H <sub>2</sub> production: 37.2 mmol g <sup>-1</sup> h <sup>-1</sup>                                                       | H <sub>2</sub> production rate: 208 mmol g <sup>-1</sup>     | Water Splitting            | 98  |
| 50 | PtNi/C-TiO <sub>2</sub> NTs                                                                          | Doping                | -                    | -                      | 108 mA cm <sup>-2</sup> | -                                                                                                            | -                   | -                   | 123 mA cm <sup>-2</sup> | -                                                                                                                          | CA: 1800 s<br>[51%, 61 mA cm <sup>-2</sup> ]                 | MOR                        | 103 |
| 51 | TiO <sub>2</sub>                                                                                     | Defect Engineering    | -                    | -                      | -                       | Power density: 5.8 μW cm <sup>-2</sup>                                                                       | -                   | -                   | -                       | Power density: 22.2 μW cm <sup>-2</sup>                                                                                    | CP: 15 min<br>[0.54 V, 90 μA cm <sup>-2</sup> ]              | MOR                        | 104 |
| 52 | ZnO, TiO <sub>2</sub> , Fe <sub>2</sub> O <sub>3</sub>                                               | ID semiconductor      | -                    | -                      | -                       | -                                                                                                            | -                   | -                   | -                       | 1.12/1.34/1.14 ZnO/TiO <sub>2</sub> /Fe <sub>2</sub> O <sub>3</sub>                                                        | -                                                            | MOR                        | 105 |
| 53 | Si NWs@ZnO                                                                                           | Heterojunction        | -                    | -                      | -                       | Short circuit current: 67.0 μA cm <sup>-2</sup> ;<br>OCP: 0.4 V                                              | -                   | -                   | -                       | Short circuit current: 100.5 μA cm <sup>-2</sup> ;                                                                         | CA: 20000 s [97.4%]                                          | MOR                        | 106 |
| 54 | pTTh                                                                                                 | Polymer semiconductor | -                    | -                      | -                       | Onset Potential: 0.66 V;<br>current density: 1.2 mA cm <sup>-2</sup>                                         | -                   | -                   | -                       | Onset Potential: 1.34 V;<br>current density: 52.8 mA cm <sup>-2</sup>                                                      | CA: 10 h [0.8 V]                                             | ORR                        | 107 |
| 55 | W-BiVO <sub>4</sub> /V <sub>2</sub> O <sub>5</sub> photoanode/<br>Cu <sub>2</sub> O/CuO photocathode | Heterojunction        | -                    | -                      | -                       | R <sub>ct</sub> : 161,000 Ω; J <sub>sc</sub> : 0 mA cm <sup>-2</sup> ;<br>OCP: 0.03 V                        | -                   | -                   | -                       | R <sub>ct</sub> : 241 Ω; J <sub>sc</sub> : 8.05 mA cm <sup>-2</sup> ;<br>OCP: 0.41 V                                       | -                                                            | ORR                        | 108 |
| 56 | Nickel foam/TiO <sub>2</sub> coating                                                                 | Semiconductor         | -                    | -                      | -                       | R <sub>ct</sub> : 3,822.25 Ω                                                                                 | -                   | -                   | -                       | R <sub>ct</sub> : 2497.75 Ω; Photocurrent density: 0.025 mA cm <sup>-2</sup>                                               | CA: 1200 s<br>[0.5 M NaOH with 0.05/0.07/0.2/0.3/0.5 M Urea] | UOR                        | 109 |
| 57 | TiO <sub>2</sub> -Fe <sub>2</sub> O <sub>3</sub> /CC                                                 | Heterojunction        | -                    | -                      | -                       | Discharge plateaus: 2.9 V [0.01 mA cm <sup>-2</sup> ];<br>Charge plateaus: 4.2 V [0.01 mA cm <sup>-2</sup> ] | -                   | -                   | -                       | Discharge plateaus: 3.2/2.5 V [0.01/1 mA cm <sup>-2</sup> ]; Charge plateaus: 3.2 V [0.01 mA cm <sup>-2</sup> ]            | 3.0/3.2 V [Discharge/charge potential after 100 cycle]       | Li-O <sub>2</sub> Battery  | 114 |
| 58 | Co-TABQ                                                                                              | Metal/Organic Polymer | -                    | -                      | -                       | Discharge voltage: 2.63 V;<br>charge voltage: 4.31 V [0.10 mA cm <sup>-2</sup> ]                             | -                   | -                   | -                       | Discharge voltage: 3.13/3.06/2.96/2.83 V; charge voltage: 3.33/3.41/3.50/3.61 V [0.10/0.20/0.30/0.50 mA cm <sup>-2</sup> ] | 50 cycle                                                     | Li-O <sub>2</sub> Battery  | 115 |
| 59 | In <sub>2</sub> S <sub>3</sub> @CNT/SS                                                               | Structural Design     | -                    | -                      | -                       | Discharge voltage: 2.73 V;<br>charge voltage: 3.86 V;<br>Round Trip Efficiency: 70.7%                        | -                   | -                   | -                       | Discharge voltage: 3.14 V; charge voltage: 3.20 V; Round Trip Efficiency: 98.1%                                            | 25 cycle/Flexibility Test<br>10 cycle<br>[0°, 45°, 180°]     | Li-CO <sub>2</sub> Battery | 116 |

|    |                                                       |               |                                                    |   |   |                                                                                     |                                                                                   |   |   |                                                                                        |                                                                                          |                                                     |                            |     |
|----|-------------------------------------------------------|---------------|----------------------------------------------------|---|---|-------------------------------------------------------------------------------------|-----------------------------------------------------------------------------------|---|---|----------------------------------------------------------------------------------------|------------------------------------------------------------------------------------------|-----------------------------------------------------|----------------------------|-----|
| 60 | TiO <sub>2</sub> /CC                                  | Semiconductor | 407/505<br>[CO <sub>2</sub> RR/CO <sub>2</sub> ER] | - | - | -                                                                                   | Discharge voltage: 2.67 V;<br>charge voltage: 3.97 V;<br>Energy Efficiency: 67.3% | - | - | 289/373<br>[CO <sub>2</sub> RR/CO <sub>2</sub> ER]                                     | Discharge voltage: 2.82 V;<br>charge voltage: 2.88 V;<br>Energy Efficiency: 97.9%        | Stable Cycling: 60 h<br>[0.01 mA cm <sup>-2</sup> ] | Li-CO <sub>2</sub> Battery | 117 |
| 61 | BiVO <sub>4</sub> or α-Fe <sub>2</sub> O <sub>3</sub> | Semiconductor | -                                                  | - | - | Charge voltage: 2.0/2.0 V<br>[BiVO <sub>4</sub> /α-Fe <sub>2</sub> O <sub>3</sub> ] | -                                                                                 | - | - | Charge voltage: 1.20/1.43 V<br>[BiVO <sub>4</sub> /α-Fe <sub>2</sub> O <sub>3</sub> ]; | CA: BiVO <sub>4</sub><br>[10 min, 84.6%]<br>α-Fe <sub>2</sub> O <sub>3</sub> [5 h, 100%] | Zn-air battery                                      | 121                        |     |
| 62 | VLS-RZAB                                              | Semiconductor | -                                                  | - | - | Charge voltage: 1.72 V;<br>Energy Efficiency: 75.64%                                | -                                                                                 | - | - | Charge voltage: 1.35/1.28 V;<br>Energy Efficiency:<br>97.78/101.64% [Visible light/UV] | 50 cycle<br>[1.65 V, 100 mW cm <sup>-2</sup> ]                                           | Zn-air battery                                      | 122                        |     |
| 63 | Ru@TS@C                                               | Semiconductor | -                                                  | - | - | 295 mV at 0.2 mA cm <sup>-2</sup>                                                   | -                                                                                 | - | - | 218 mV at 0.2 mA cm <sup>-2</sup>                                                      | 76% round-trip<br>efficiency retention after<br>300 h under light                        | Zn-air battery                                      | 123                        |     |

---
